# Supplementary material
Source: MDPI journal article supplement (https://www.mdpi.com/2073-4441/14/3/297)
Supplement: s1 [file s1]

**Table S1: Details of Samples sent for Sequencing & RT-qPCR Detection**

| Sample Code | Date of Collection | Type of Sample | Number of Samples combined | WWTPs Site covered  | Nanodrop Readings (ng/μl) | Nanodrop OD A260/280 | NanoDrop ODA260/230 |
|-------------|--------------------|----------------|----------------------------|---------------------|---------------------------|----------------------|---------------------|
| 1           | 27 February 2021   | Individual     | 1                          | 3                   | 9.3                       | 1.8                  | 0.1                 |
| 2           | 20 February 2021   | Pooled         | 2                          | 9 & 2               | 11.1                      | 1.8                  | 0.1                 |
| 3           | 12 March 2021      | Pooled         | 2                          | 5 & 7               | 11.2                      | 1.4                  | 0.5                 |
| 4           | 19 March 2021      | Pooled         | 3                          | 7, 4, 5             | 16.8                      | 1.7                  | 0.1                 |
| 5           | 1 April 2021       | Pooled         | 7                          | 4, 2, 3, 1, 5, 8, 4 | 6.8                       | 1.5                  | 0.1                 |
| 6           | 9 April 2021       | Pooled         | 7                          | 5, 2, 8, 6, 4, 1, 3 | 19.1                      | 1.7                  | 0.5                 |
| 7           | 20 April 2021      | Pooled         | 6                          | 5, 8, 4, 2, 3, 1    | 32.7                      | 1.9                  | 0.1                 |
| 8           | 1 May 2021         | Pooled         | 5                          | 5, 4, 1, 6, 8       | 35.3                      | 2.0                  | 0.4                 |
| 9           | 8 May 2021         | Pooled         | 5                          | 4, 6, 5, 11, 1      | 29.1                      | 1.8                  | 0.9                 |
| 10          | 15 May 2021        | Pooled         | 6                          | 2, 7, 5, 4, 6, 8    | 41.0                      | 1.9                  | 0.1                 |
| 11          | 24 May 2021        | Pooled         | 4                          | 9, 7, 10, 6         | 50.3                      | 1.8                  | 0.1                 |

**Table S2. Mapping and Consensus Statistics.**

| Sample Name | Reference Sequence                                                                                | Mapping (%) | Genome Coverage (%) | No. of sequence(s) | Total length of consensus (bp) |
|-------------|---------------------------------------------------------------------------------------------------|-------------|---------------------|--------------------|--------------------------------|
| 1           | Severe acute respiratory syndrome coronavirus 2 isolate Wuhan-Hu-1, complete genome (NC_045512.2) | 90.67       | 94.42               | 1                  | 29,869                         |
| 2A          |                                                                                                   | 87.64       | 91.08               | 1                  | 29,869                         |
| 3A          |                                                                                                   | 90.56       | 92.48               | 1                  | 29,903                         |
| 4A          |                                                                                                   | 89.36       | 94.17               | 1                  | 29,903                         |
| 5A          |                                                                                                   | 89.74       | 92.11               | 1                  | 29,903                         |
| 6A          |                                                                                                   | 91.82       | 91.45               | 1                  | 29,903                         |
| 7A          |                                                                                                   | 88.02       | 99.52               | 1                  | 29,903                         |
| 8A          |                                                                                                   | 92.47       | 95.95               | 1                  | 29,900                         |
| 9A          |                                                                                                   | 91.21       | 93.38               | 1                  | 29,903                         |
| 10A         |                                                                                                   | 93.39       | 99.91               | 1                  | 29,903                         |
| 11A         |                                                                                                   | 90.63       | 92.99               | 1                  | 29,903                         |

Table S3. RT qPCR Detection.

| Sample Code | Qualitative Detection |        |           |        | Quantitative Detection |        |                      |                   |
|-------------|-----------------------|--------|-----------|--------|------------------------|--------|----------------------|-------------------|
|             | IC                    | E gene | RdRp gene | N gene | IC                     | N gene | Copy no./Litre       | Log <sub>10</sub> |
| JPR 1       | 29                    | 33     | 37        | 33     | -                      | 36.36  | 2.15×10 <sup>4</sup> | 4.40              |
| JPR 2       | 28                    | -      | 38        | 30     | -                      | 35.21  | 9.44×04              | 4.97              |
|             | 27                    | 36     | -         | 32     | -                      | 34.61  | 1.46×05              | 5.16              |
| JPR 3       | 24                    | -      | 37        | -      | 35.79                  | 32.84  | 2.38×05              | 5.38              |
|             | 24                    | 36     | 38        | -      | 37.35                  | 32.62  | 2.82×05              | 5.45              |
| JPR 4       | 25                    | -      | 37        | 33     | 35.45                  | 32.89  | 3.85×04              | 4.58              |
|             | 26                    | -      | 37        | 33     | 35.14                  | 33.14  | 2.99 ×04             | 4.48              |
|             | 26                    | -      | 36        | 33     | 35.41                  | 33.02  | 3.38×04              | 4.53              |
| JPR 5       | 27                    | 31     | 36        | 34     | 36.8                   | 32.12  | 1.10×06              | 6.04              |
|             | 26                    | 33     | 34        | 34     | 36.86                  | 32.4   | 9.16×05              | 5.96              |
|             | 26                    | 31     | -         | 34     | 37.32                  | 32.87  | 6.80×05              | 5.83              |
|             | 26                    | 31     | 35        | 34     | 37.11                  | 32.51  | 8.56×05              | 5.93              |
|             | 27                    | 32     | 32        | 35     | 38.4                   | 32.68  | 7.69×05              | 5.89              |
|             | 26                    | 32     | 36        | 34     | 39.26                  | 32.54  | 8.39×05              | 5.92              |
|             | 31                    | 31     | 34        | 34     | 38.39                  | 32.54  | 8.38×05              | 5.92              |
|             | 24                    | 31     | 34        | 33     | 34.55                  | 32.48  | 5.93×04              | 4.77              |
| JPR 6       | 26                    | 32     | -         | 34     | 34.95                  | 32.2   | 7.85×04              | 4.89              |
|             | 25                    | 33     | -         | 33     | 35.17                  | 32.78  | 4.32×04              | 4.64              |
|             | 26                    | 31     | 34        | 34     | 34.82                  | 32.72  | 4.63×04              | 4.67              |
|             | -                     | -      | 39        | 34     | 36.88                  | 32.72  | 4.62×04              | 4.66              |
|             | 25                    | 31     | 33        | 33     | 35.58                  | 32.22  | 7.71×04              | 4.89              |
|             | 27                    | 33     | 35        | 34     | 35.41                  | 32.52  | 5.68×04              | 4.75              |
|             | 26                    | 29     | 34        | 31     | 35.89                  | 31.72  | 5.63×05              | 5.75              |
| JPR 7       | 26                    | 30     | 33        | 31     | 37.7                   | 32.21  | 3.87×05              | 5.59              |
|             | 28                    | 32     | -         | 32     | 36.7                   | 32.67  | 2.71×05              | 5.43              |
|             | 29                    | 30     | 33        | 31     | 35.33                  | 32.12  | 4.14×05              | 5.62              |
|             | 28                    | 30     | 33        | 31     | 37.17                  | 32.34  | 3.50×05              | 5.54              |
|             | 29                    | 31     | 33        | 31     | 36.18                  | 32.54  | 2.99×05              | 5.48              |
|             | 31                    | 32     | 35        | 32     | 38.6                   | 35.91  | 1.90×05              | 5.28              |
| JPR 8       | 27                    | 32     | 35        | 33     | 36.99                  | 35.24  | 3.26×05              | 5.51              |
|             | 29                    | 32     | 37        | 33     | 36.93                  | 35     | 3.95×05              | 5.60              |
|             | 33                    | 31     | -         | 32     | 36.59                  | 34.99  | 3.98×05              | 5.60              |
|             | 29                    | 32     | 37        | 32     | 36.58                  | 36.01  | 1.77×05              | 5.25              |
|             | 26                    | 32     | 36        | 33     | 36.84                  | 34.61  | 5.40×05              | 5.73              |
| JPR 9       | 26                    | 31     | 33        | 32     | 36.52                  | 34.9   | 4.29×05              | 5.63              |
|             | 26                    | 31     | 36        | 32     | 37.56                  | 34.29  | 7.00×05              | 5.84              |
|             | 28                    | 34     | -         | 33     | 37.56                  | 35.01  | 3.92×05              | 5.59              |
|             | 27                    | 32     | 35        | 33     | 36.23                  | 32.55  | 1.13×05              | 5.05              |

Table S3. Cont.

| Sample Code | Qualitative Detection |        |           |        | Quantitative Detection |        |                |                   |
|-------------|-----------------------|--------|-----------|--------|------------------------|--------|----------------|-------------------|
|             | IC                    | E gene | RdRp gene | N gene | IC                     | N gene | Copy no./Litre | Log <sub>10</sub> |
| JPR 10      | 27                    | 32     | -         | 32     | 37.27                  | 34.36  | 6.61×05        | 5.82              |
|             | 27                    | 32     | -         | 31     | 36.21                  | 34.14  | 7.90×05        | 5.90              |
|             | 29                    | 32     | -         | 32     | 36.47                  | 34.47  | 6.03×05        | 5.78              |
|             | 27                    | 33     | -         | 32     | 36.08                  | 35.02  | 3.90×05        | 5.59              |
|             | 28                    | 32     | -         | 32     | 36.12                  | 34.44  | 6.17×05        | 5.79              |
|             | 29                    | -      | 39        | 35     | -                      | -      | LOD            | -                 |
| JPR 11      | 26                    | 37     | -         | 36     | -                      | -      | LOD            | -                 |
|             | 26                    | 34     | -         | 38     | -                      | -      | LOD            | -                 |
|             | 26                    | 36     | -         | 38     | -                      | -      | LOD            | -                 |
|             | 26                    | 35     | -         | 38     | -                      | 38.11  | 5.53×04        | 4.74              |

Note: IC- Internal Control, LOD- Limit of detection.
